# Supplementary material for: Ectopic pregnancy risk factors in infertile patients: a 10-year single center experience
Source: PubMed Central journal article supplement (PMC9705323; doi:10.1038/s41598-022-24649-w), 2022-11-28
Supplement: 41598_2022_24649_MOESM1_ESM.pdf [file 41598_2022_24649_MOESM1_ESM.pdf]

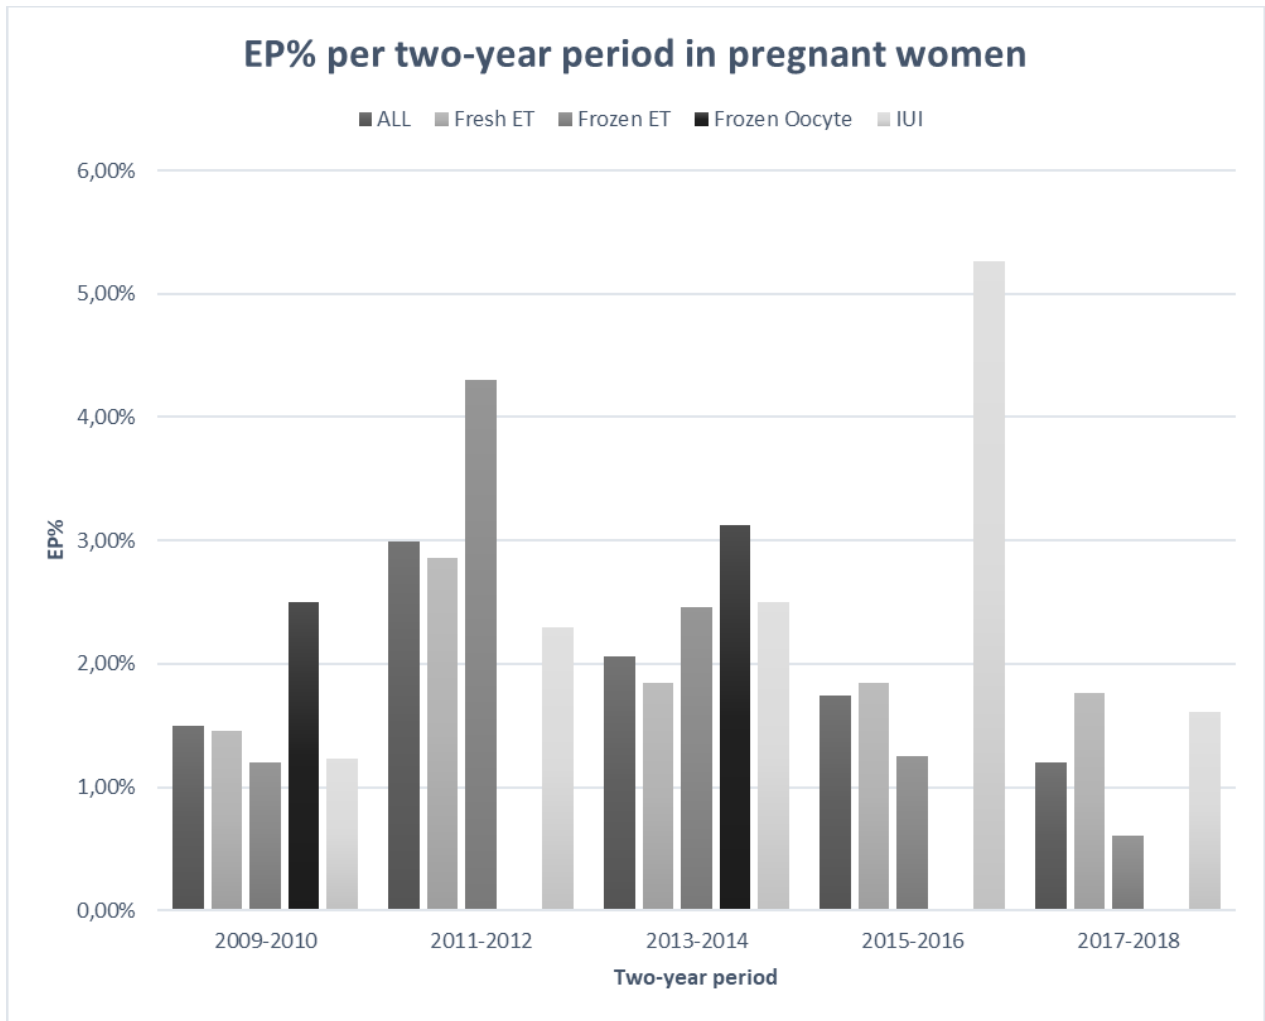

**Supplementary Fig 1: EP% per two-year periods for pregnant women.** EP: ectopic pregnancy; ET: Embryo Transfer; IUI: intrauterine insemination.
