# Supplementary material for: Ectopic pregnancy risk factors in infertile patients: a 10-year single center experience
Source: PubMed Central journal article supplement (PMC9705323; doi:10.1038/s41598-022-24649-w), 2022-11-28
Supplement: 41598_2022_24649_MOESM2_ESM.pdf [file 41598_2022_24649_MOESM2_ESM.pdf]

|                                                           |                     |       |                     |       |
|-----------------------------------------------------------|---------------------|-------|---------------------|-------|
| <b>Primary infertility</b>                                | 0.23 (0.06-0.92)    | 0.038 | 0.17 (0.03-0.84)    | 0.029 |
| <b>Previous Ectopic Pregnancies</b>                       | NC                  |       |                     |       |
| <b>Recurrent Pregnancy Failure</b>                        | NC                  |       |                     |       |
| <b>Basal FSH (mUI/mL)</b>                                 | 1.02 (0.74-1.42)    | 0.886 |                     |       |
| <b>Basal AMH</b>                                          | 1.01 (0.82-1.23)    | 0.937 |                     |       |
| <b>AFC</b>                                                | 0.98 (0.88-1.09)    | 0.742 |                     |       |
| <b>Positive history for pelvic adhesions <sup>a</sup></b> | 10.33 (1.05-101.93) | 0.046 | 31.14 (2.26-428.73) | 0.010 |
| <b>Presence of myoma/s</b>                                | 2.44 (0.50-11.92)   | 0.272 |                     |       |
| <b>Indication to treatment</b>                            |                     |       |                     |       |
| Male factor                                               | 0.60 (0.07-4.80)    | 0.628 |                     |       |
| Tubal factor                                              | NC                  |       |                     |       |
| Endometriosis                                             | 5.11 (0.58-45.28)   | 0.143 |                     |       |
| Unexplained                                               | 1.50 (0.42-5.40)    | 0.535 |                     |       |
| Male and female factor                                    | NC                  |       |                     |       |
| Ovulatory                                                 | 1.06 (0.22-5.08)    | 0.946 |                     |       |
| Reduced ovarian reserve                                   | NC                  |       |                     |       |
| Multiple female factors                                   | NC                  |       |                     |       |
| Total sperm count (10 <sup>6</sup> )                      | 1.01 (1.00-1.01)    | 0.026 | 1.01 (1.00-1.01)    | 0.041 |
| Progressive motility                                      | 0.97 (0.90-1.04)    | 0.395 |                     |       |
| Semen normal form (%)                                     | 1.01 (0.80-1.27)    | 0.957 |                     |       |

**Supplementary Table 1.** Univariable and Multivariable logistic regression (ectopic vs eutopic pregnancy) in IUI. (BMI: Body Mass Index; FSH: Follicular Stimulating Hormone; AMH: Anti-Mullerian Hormone; AFC: Antral Follicular Count). Multivariable results are corrected by years.

<sup>a</sup> i.e. pelvic infections, endometriosis, pelvic adhesions and frozen pelvis.

|                       |                  |       |
|-----------------------|------------------|-------|
| 1 transferred embryo  | 0.85 (0.44-1.66) | 0.643 |
| 2 transferred embryos | 1.61 (1.19-2.17) | 0.002 |

**Supplementary Table 2.** Pregnancy in transfer of blastocyst stage VS cleavage stage embryos per number of transferred embryos.
